# Supplementary material for: Identification and Heterologous Expression of the Kendomycin B Biosynthetic Gene Cluster from Verrucosispora sp. SCSIO 07399
Source: MDPI journal article supplement (doi:10.3390/md19120673), 2021-11-26
Supplement: s1 [file s1]

## Supporting Information

### Identification and heterologous expression of the kendomycin B biosynthetic gene cluster from *Verrucosispora* sp. SCSIO 07399

Jiang Chen <sup>1,2,3,4</sup>, Shanwen Zhang <sup>1,3</sup>, Yingying Chen <sup>1,2,4</sup>, Xinpeng Tian <sup>1</sup>, Yucheng Gu <sup>5</sup> and Jianhua Ju <sup>1,2,3,4\*</sup>

<sup>1</sup> CAS Key Laboratory of Tropical Marine Bio-resources and Ecology, Guangdong Key Laboratory of Marine Materia Medica, RNAM Center for Marine Microbiology, South China Sea Institute of Oceanology, Chinese Academy of Sciences, 164 West Xingang Road, Guangzhou 510301, China; chenjluck@126.com (J.C.); sherry920111@163.com (S.Z.); chenyingying7788@163.com (Y.C.); xinpengtian@scsio.ac.cn (X.T.)

<sup>2</sup> Southern Marine Science and Engineering Guangdong Laboratory (Guangzhou), No.1119, Haibin Rd., Nansha District, Guangzhou 511458, China

<sup>3</sup> College of Oceanology, University of Chinese Academy of Sciences, Qingdao 266400, China

<sup>4</sup> Sanya Institute of Oceanology, SCSIO, Zhenzhou Road, Yazhou District, Sanya 572000, China

<sup>5</sup> Syngenta Jealott's Hill International Research Centre, Bracknell, Berkshire RG42 6EY, UK; yucheng.gu@syngenta.com (Y.G.)

\* Correspondence: jju@scsio.ac.cn (J.J.); Tel./Fax: +86-20-8902-3028 (J.J.)

| Item Name          | Contents/Description                                                                                                           | Page  |
|--------------------|--------------------------------------------------------------------------------------------------------------------------------|-------|
| <b>Table S1.</b>   | Strains and plasmids applied or constructed in this study.                                                                     | S2    |
| <b>Table S2.</b>   | Primers used in this study.                                                                                                    | S3-S4 |
| <b>Figure S1.</b>  | Structures of kendomycins.                                                                                                     | S5    |
| <b>Figure S2.</b>  | Construction of <i>kmy11</i> gene mutant strain of <i>Verrucosisspora</i> sp. SCSIO 07399 by PCR-targeting technique.          | S5    |
| <b>Figure S3.</b>  | Construction of <i>kmy18</i> gene mutant strain of <i>Verrucosisspora</i> sp. SCSIO 07399 by PCR-targeting technique.          | S5    |
| <b>Figure S4.</b>  | HPLC analysis of fermentation broths from gene mutant strains.                                                                 | S6    |
| <b>Figure S5.</b>  | Construction of <i>orf(-2)-kmy3</i> genes mutant strain of <i>Verrucosisspora</i> sp. SCSIO 07399 by PCR-targeting technique.  | S6    |
| <b>Figure S6.</b>  | Construction of <i>kmy27-orf(+2)</i> genes mutant strain of <i>Verrucosisspora</i> sp. SCSIO 07399 by PCR-targeting technique. | S7    |
| <b>Figure S7.</b>  | Construction of <i>kmy29</i> gene mutant strain of <i>Verrucosisspora</i> sp. SCSIO 07399 by PCR-targeting technique.          | S7    |
| <b>Figure S8.</b>  | Construction of <i>kmy29</i> gene complemented strain by site-specific recombinase $\phi$ C31 system.                          | S8    |
| <b>Figure S9.</b>  | Construction of <i>kmy22-25</i> genes mutant strain of <i>Verrucosisspora</i> sp. SCSIO 07399 by PCR-targeting technique.      | S8    |
| <b>Figure S10.</b> | Construction of <i>kmy26</i> gene mutant strain of <i>Verrucosisspora</i> sp. SCSIO 07399 by PCR-targeting technique.          | S9    |
| <b>Figure S11.</b> | Chemical complementation of type III PKS gene mutant strain $\Delta$ <i>kmy18</i> .                                            | S9    |
| <b>Figure S12.</b> | Sequence alignment of type I PKS domains from kendomycin B gene cluster.                                                       | S10   |
| <b>Figure S13.</b> | Sequence alignment of TE domains.                                                                                              | S10   |
| <b>Figure S14.</b> | Phylogenetic analysis of Kmy12_TE and other thioesterases.                                                                     | S11   |
| <b>Figure S15.</b> | Sequence analysis of Kmy9 and Kmy13.                                                                                           | S11   |
| <b>Figure S16.</b> | Phylogenetic analysis of Kmy13.                                                                                                | S12   |
| <b>Figure S17.</b> | Phylogenetic analysis of Kmy4 and other LuxR-type regulators.                                                                  | S12   |
| <b>Figure S18.</b> | Sequence alignment of Kmy4 with several representative LAL-type of LuxR family regulators.                                     | S13   |
| <b>Figure S19.</b> | Construction of <i>kmy4</i> gene mutant strain of <i>Verrucosisspora</i> sp. SCSIO 07399 by PCR-targeting technique.           | S13   |
| <b>Figure S20.</b> | Construction of <i>kmy4</i> gene complemented strain by site-specific recombinase $\phi$ C31 system.                           | S14   |
| <b>Figure S21.</b> | Construction of <i>kmy6</i> gene mutant strain of <i>Verrucosisspora</i> sp. SCSIO 07399 by PCR-targeting technique.           | S14   |
| <b>Figure S22.</b> | HPLC analysis of fermentation broths from regulatory gene mutants.                                                             | S15   |
| <b>Figure S23.</b> | PCR identification of the genotype of <i>kmy</i> gene cluster hetero-expression strain.                                        | S15   |
| -                  | Supplemental references.                                                                                                       | S16   |

**Table S1.** Strains and plasmids applied or constructed in this study.

| Strains or plasmids                                                   | Description                                                                                                | Reference or source |
|-----------------------------------------------------------------------|------------------------------------------------------------------------------------------------------------|---------------------|
| <b>Strains</b>                                                        |                                                                                                            |                     |
| <i>E. coli</i> LE392                                                  | Host strain of cosmid vector SuperCosI                                                                     | Stratagene          |
| <i>E. coli</i> DH10 $\beta$                                           | Host strain of plasmid vector <b>pHZAUFXJ</b>                                                              | Stratagene          |
| <i>E. coli</i> BW25113/pIJ790                                         | Strain for homologous reorganization during PCR-targeting process                                          | 1                   |
| <i>E. coli</i> DH5 $\alpha$ /pIJ773                                   | Host strain of plasmid pIJ773                                                                              | Stratagene          |
| <i>E. coli</i> ET12567/pUZ8002                                        | Strain for conjugation with <i>Streptomyces</i>                                                            | 2                   |
| <i>E. coli</i> ET12567/pUB307                                         | Strain for triparental conjugation with <i>Streptomyces</i>                                                | 3                   |
| <i>E. coli</i> DH5 $\alpha$ /pL646ATE-ssaA-BXSE                       | Host strain of plasmid pL646ATE-ssaA-BXSE                                                                  | Our lab             |
| <i>Verrucosisspora</i> sp. SCSIO 07399                                | Producing strain of kendomycin B-D                                                                         | This study          |
| <i>Streptomyces coelicolor</i> M1152                                  | Heterologous expression host                                                                               | 3                   |
| <i>S. coelicolor</i> M1152::pHZAUFXJ-3-J11                            | Kendomycin gene cluster hetero-expression strain                                                           | This study          |
| <i>Verrucosisspora</i> sp. SCSIO 07399/ $\Delta$ orf(-2)-kmy3         | orf(-2)-kmy3 genes mutant strain derived from <i>Verrucosisspora</i> sp. SCSIO 07399                       | This study          |
| <i>Verrucosisspora</i> sp. SCSIO 07399/ $\Delta$ kmy22-25             | kmy22-25 genes mutant strain derived from <i>Verrucosisspora</i> sp. SCSIO 07399                           | This study          |
| <i>Verrucosisspora</i> sp. SCSIO 07399/ $\Delta$ kmy27-orf(+2)        | kmy27-orf(+2) genes mutant strain derived from <i>Verrucosisspora</i> sp. SCSIO 07399                      | This study          |
| <i>Verrucosisspora</i> sp. SCSIO 07399/ $\Delta$ kmy4                 | kmy4 gene mutant strain derived from <i>Verrucosisspora</i> sp. SCSIO 07399                                | This study          |
| <i>Verrucosisspora</i> sp. SCSIO 07399/ $\Delta$ kmy6                 | kmy6 gene mutant strain derived from <i>Verrucosisspora</i> sp. SCSIO 07399                                | This study          |
| <i>Verrucosisspora</i> sp. SCSIO 07399/ $\Delta$ kmy11                | kmy11 gene mutant strain derived from <i>Verrucosisspora</i> sp. SCSIO 07399                               | This study          |
| <i>Verrucosisspora</i> sp. SCSIO 07399/ $\Delta$ kmy18                | kmy18 gene mutant strain derived from <i>Verrucosisspora</i> sp. SCSIO 07399                               | This study          |
| <i>Verrucosisspora</i> sp. SCSIO 07399/ $\Delta$ kmy26                | kmy26 gene mutant strain derived from <i>Verrucosisspora</i> sp. SCSIO 07399                               | This study          |
| <i>Verrucosisspora</i> sp. SCSIO 07399/ $\Delta$ kmy29                | kmy29 gene mutant strain derived from <i>Verrucosisspora</i> sp. SCSIO 07399                               | This study          |
| <i>Verrucosisspora</i> sp. SCSIO 07399/ $\Delta$ kmy4::kmy4           | kmy4 gene complemented strain derived from <i>Verrucosisspora</i> sp. SCSIO 07399/ $\Delta$ kmy4           | This study          |
| <i>Verrucosisspora</i> sp. SCSIO 07399/ $\Delta$ kmy27-orf(+2)::kmy29 | kmy29 gene complemented strain derived from <i>Verrucosisspora</i> sp. SCSIO 07399/ $\Delta$ kmy27-orf(+2) | This study          |
| <b>Plasmids</b>                                                       |                                                                                                            |                     |
| SuperCosI                                                             | Amp <sup>r</sup> , Kan <sup>r</sup> , cosmid vector                                                        | Stratagene          |
| <b>pHZAUFXJ</b>                                                       | Apr <sup>r</sup> , plasmid vector                                                                          | Stratagene          |
| pIJ790                                                                | Cml <sup>r</sup> ; gam, bet, exo encoding $\lambda$ -RED reorganization system for PCR-targeting           | 4                   |
| pIJ773                                                                | Apr <sup>r</sup> , provider of oriT/acc(3)IV cassette                                                      | 4                   |
| pUZ8002                                                               | Kan <sup>r</sup> , non-transmissible plasmid with tra gene for conjugation                                 | 5                   |
| pUB307                                                                | Kan <sup>r</sup> , transmissible plasmid with tra gene for conjugation                                     | 3                   |
| pL646ATE-ssaA-BXSE                                                    | Apr <sup>r</sup> , Tsr <sup>r</sup> , ermE* p1&p2, complemented vector                                     | Derived from pL646  |

**Table S2.** Primers used in this study.

| Primers                                             | Sequence (5' - 3')                                           |
|-----------------------------------------------------|--------------------------------------------------------------|
| <b>For genomic library screening</b>                |                                                              |
| <i>kmy3</i> -SF                                     | GCGAAGACGGTGCAGACCGA                                         |
| <i>kmy3</i> -SR                                     | CCGGACGAGGTACACGACGC                                         |
| <i>kmy13</i> -SF                                    | GTCTGGACGGACATGCGGGA                                         |
| <i>kmy13</i> -SR                                    | GGCTCACGTACGTACGCAG                                          |
| <i>kmy28</i> -SF                                    | GAAGTGGTAATCGCCGAAGCG                                        |
| <i>kmy28</i> -SR                                    | GCAAAGTTCGTCTCGTCCCGATC                                      |
| <i>orf(+4)</i> -SF                                  | CTCTGGCATGGAAGCGTCC                                          |
| <i>orf(+4)</i> -SR                                  | CGCGCATAGTGTGGGTATG                                          |
| <b>For construction of gene mutant strain</b>       |                                                              |
| <i>orf(-2)-kmy3-delF</i>                            | GCGCACGGCATCGACAGCAACTACGCCAACTGTATCGTGattccggggatccgtcgacc  |
| <i>orf(-2)-kmy3-delR</i>                            | GGTGGTGTAGAGGACCTTGCGGACCTCGTGGTCTAGTCTgtaggctggagctgcttc    |
| <i>orf(-2)-kmy3-testF</i>                           | CGACTCCATCGACATCCGCC                                         |
| <i>orf(-2)-kmy3-testR</i>                           | GGACCTTCATCGCGGCCTG                                          |
| <i>kmy22-25-delF</i>                                | GTGATGATGACCGTCCGGGATTCTGTGGACCAACGCGCTGattccggggatccgtcgacc |
| <i>kmy22-25-delR</i>                                | GATCACCTTGGTCGCGCCGAGCGACTTGGAGTTCATCGTgtaggctggagctgcttc    |
| <i>kmy22-25-testF</i>                               | CACCGGCACCAACCATCGC                                          |
| <i>kmy22-25-testR</i>                               | GCTCGGCGATCAGCCGTG                                           |
| <i>kmy27-orf(+2)-delF</i>                           | GTTGTACGACAGGCTCACGGCCACACTGGTGCCGTTTCGcattccggggatccgtcgacc |
| <i>kmy27-orf(+2)-delR</i>                           | GCCGAGGATCGCGTCACCCACATGGATCAGCGAGCACACTgtaggctggagctgcttc   |
| <i>kmy27-orf(+2)-testF</i>                          | GACGGAAGAGGTAGGCCCCC                                         |
| <i>kmy27-orf(+2)-testR</i>                          | CGAGCGCCGAAGTCGCTG                                           |
| <i>kmy4-delF</i>                                    | GGAGTCGACGACGCGGAGTACGCGGACACGGCCTCGCTGattccggggatccgtcgacc  |
| <i>kmy4-delR</i>                                    | CCGGCCGGCCCCGGAGCAGGTCCACGAGCTGAGGAAGGTGttaggctggagctgcttc   |
| <i>kmy4-testF</i>                                   | CTGATCGCGGAGGCTCGCC                                          |
| <i>kmy4-testR</i>                                   | GCCGCCCCGTACCAGAGCAG                                         |
| <i>kmy6-delF</i>                                    | GAGGCCTTCGCCGAGCACGGTCTGGCGCTCGACGTACGGattccggggatccgtcgacc  |
| <i>kmy6-delR</i>                                    | GACCGGCTGGAGTTCGTCTTGGCACTGCTGGAAGCGCGGttaggctggagctgcttc    |
| <i>kmy6-testF</i>                                   | GACGCCGTCGACAACCGC                                           |
| <i>kmy6-testR</i>                                   | CGCAGCACACCGGCGTC                                            |
| <i>kmy11-delF</i>                                   | GTCATGTACCACGACTACGCCGCCCGGCTGACCGAGATCattccggggatccgtcgacc  |
| <i>kmy11-delR</i>                                   | GCGTACCAAGGCAAGGATCTTGTGGTTGTTGCGGCGTGCTgtaggctggagctgcttc   |
| <i>kmy11-testF</i>                                  | CCTGGGAGACGTTTCGAGCG                                         |
| <i>kmy11-testR</i>                                  | GATCACCCGCTGCTGCGAAG                                         |
| <i>kmy18-delF</i>                                   | GACGCCGACCTGTCCGATGTGCGATACCTCTGCTGCGTCattccggggatccgtcgacc  |
| <i>kmy18-delR</i>                                   | GGAATCCCAGTCGTAACGCATTGCGTCGACTGCCTCGGGttaggctggagctgcttc    |
| <i>kmy18-testF</i>                                  | GAGAGTCAGGCCGACCTGC                                          |
| <i>kmy18-testR</i>                                  | CCGATGATCGTTTCCGCGTG                                         |
| <i>kmy26-delF</i>                                   | GGCAAGGTCTACTTCGGCGACTACCGGGGCTACCTCTACattccggggatccgtcgacc  |
| <i>kmy26-delR</i>                                   | CACGATCTCGCCGGTCCGTGCGTCGAAGGTGTGGTAGACTgtaggctggagctgcttc   |
| <i>kmy26-testF</i>                                  | CTTCTACGCCGTGGACGCC                                          |
| <i>kmy26-testR</i>                                  | GTTCAGCGCGAAGAGCGTG                                          |
| <i>kmy29-delF</i>                                   | GAGGTAAGTGAACGCCATGGACACGCACATGCACGCCGAGattccggggatccgtcgacc |
| <i>kmy29-delR</i>                                   | CAGATCGTCCACCCAGCCCGCCACGCACTCGTCCAGTTGttaggctggagctgcttc    |
| <i>kmy29-testF</i>                                  | GGTGCGGTACGCGAAACGC                                          |
| <i>kmy29-testR</i>                                  | GCATGTCGACGGACCGCAG                                          |
| <b>For construction of gene complemented strain</b> |                                                              |
| <i>kmy4-cplF</i>                                    | GCTTCATATGATGGTGGACAGCGACAGG                                 |
| <i>kmy4-cplR</i>                                    | AATTGGATCCCTCATGCCGTTTCGGCCAG                                |
| <i>kmy29-cplF</i>                                   | GGCATATGATGGCAGAGGACGACAGGCC                                 |

---

|                           |                                |
|---------------------------|--------------------------------|
| <i>kmy29-cplR</i>         | <u>GGATCCTCAGCGGCCCTCCCAGC</u> |
| <b>For real-time qPCR</b> |                                |
| RT- <i>kmy9</i> -F        | CGTCATCATCATGAGCATCC           |
| RT- <i>kmy9</i> -R        | GCAGATAGGCGGTCTTGAAC           |
| RT- <i>kmy10</i> -F       | CGTATTACGCGTTGGTGGAT           |
| RT- <i>kmy10</i> -R       | ACACCCACCACACTCCACTT           |
| RT- <i>kmy11</i> -F       | GACGCGGACTACTGGTATCG           |
| RT- <i>kmy11</i> -R       | AGATACAGCCGTTGCAGACC           |
| RT- <i>kmy13</i> -F       | CACCAGGTGGAAGTGTACGA           |
| RT- <i>kmy13</i> -R       | GTCCGTCCAGACCAGCAG             |
| RT- <i>kmy16</i> -F       | AGGTCGAGGACCTGGAGACA           |
| RT- <i>kmy16</i> -R       | TCTGGATGTAGCCGATCTCC           |
| RT- <i>kmy18</i> -F       | ATGCGTTACGACTGGGATTC           |
| RT- <i>kmy18</i> -R       | CGAGTCGATGACCTTCTTCC           |
| RT- <i>kmy19</i> -F       | CCTGTTCCCTCCTCACTGGTC          |
| RT- <i>kmy19</i> -R       | GGCGCTCCAGCAGTAGTAGT           |
| RT- <i>kmy23</i> -F       | GACCATCCAGAACGACATCC           |
| RT- <i>kmy23</i> -R       | GTGGTATCCGGAGATCGAGA           |
| RT-16S-F                  | CTCTTCGACCTCGGTGTCTC           |
| RT-16S-R                  | GAACTTCTCCTCGCCGTACA           |

---

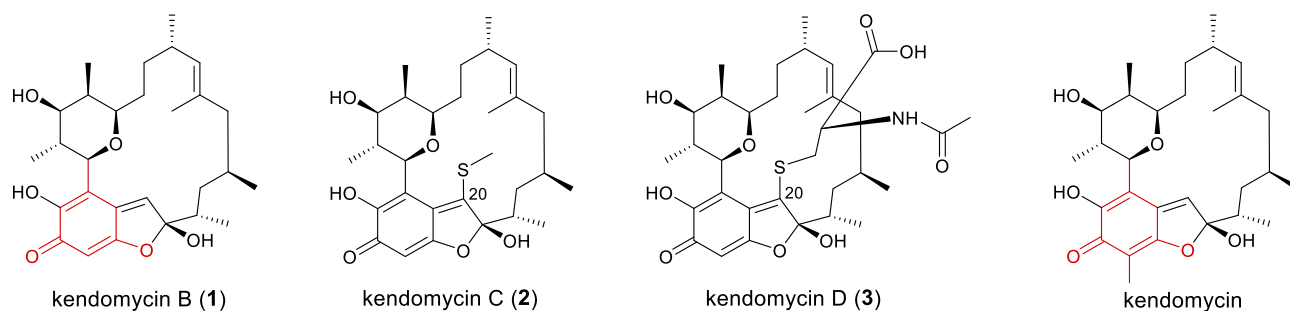

**Figure S1.** Structures of kendomycins. Kendomycin B-D (1-3) purified from *Verrucospora* sp. SCSIO 07399 [6] and kendomycin produced by *Streptomyces violaceoruber* strain 3844-33C reported previously.

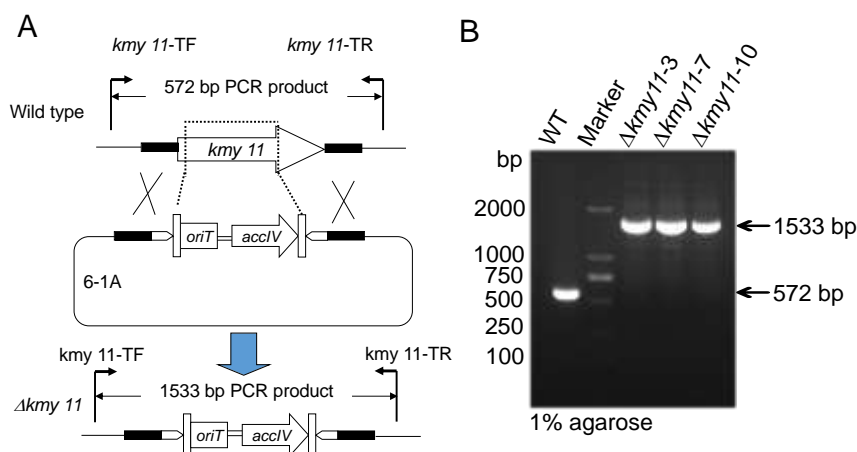

**Figure S2.** Construction of *kmy11* gene mutant strain of *Verrucospora* sp. SCSIO 07399 by PCR-targeting technique. (A) Schematic diagram of gene *kmy11* disruption. (B) Verification of the gene *kmy11* double-cross mutants by comparing with the wild-type strain via PCR using the primers listed in Table S2. WT: wild-type strain;  $\Delta kmy11$ : gene *kmy11* mutant strains. Marker: DL2000 DNA Marker (Takara).

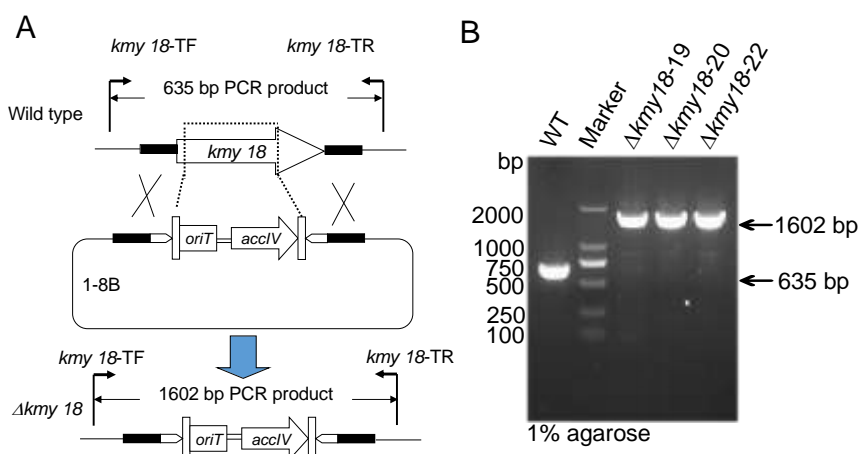

**Figure S3.** Construction of *kmy18* gene mutant strain of *Verrucospora* sp. SCSIO 07399 by PCR-targeting technique. (A) Schematic diagram of gene *kmy18* disruption. (B) Verification of the gene *kmy18* double-cross mutants by comparing with the wild-type strain via PCR using the primers listed in Table S2. WT: wild-type strain;  $\Delta kmy18$ : gene *kmy18* mutant strains. Marker: DL2000 DNA Marker (Takara).

i. *Verrucosispora* sp. SCSIO 07399

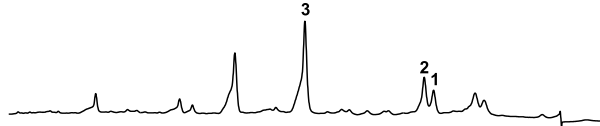

ii. SCSIO 07399/ $\Delta kmy11$

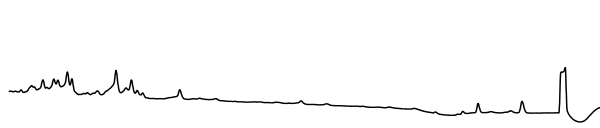

iii. SCSIO 07399/ $\Delta kmy18$

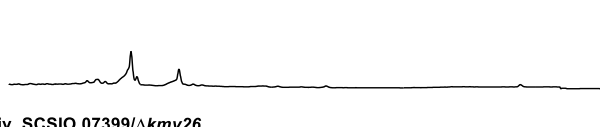

iv. SCSIO 07399/ $\Delta kmy26$

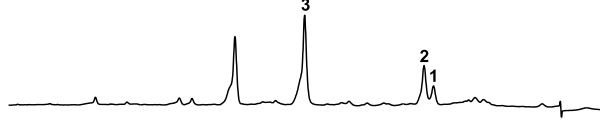

v. SCSIO 07399/ $\Delta kmy29$

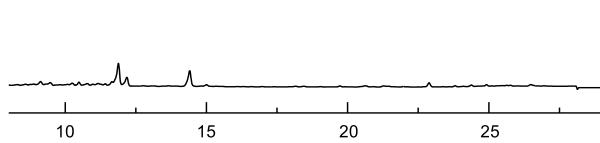

vi. *Verrucosispora* sp. SCSIO 07399

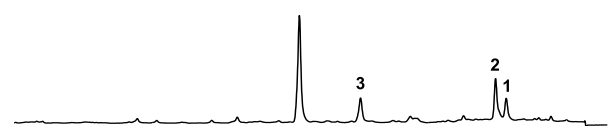

vii. SCSIO 07399/ $\Delta orf(-2)$ -*kmy3*

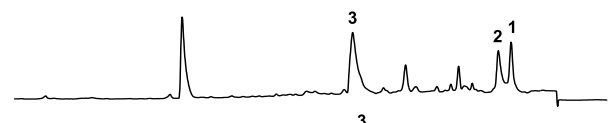

viii. SCSIO 07399/ $\Delta kmy22$ -*kmy25*

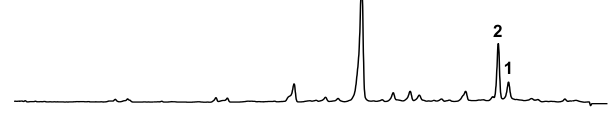

ix. SCSIO 07399/ $\Delta kmy27$ -*orf(+2)*

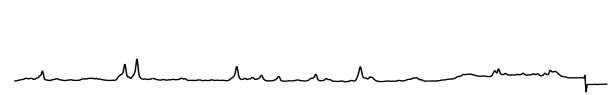

x. SCSIO 07399/ $\Delta kmy27$ -*orf(+2)::kmy29*

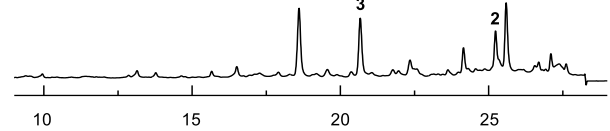

**Figure S4.** HPLC analysis (UV at 285 nm) of fermentation broths from (i) the wild-type strain *Verrucosispora* sp. SCSIO 07399; (ii) mutant strain *Verrucosispora* sp. SCSIO 07399/ $\Delta kmy11$ ; (iii) mutant strain *Verrucosispora* sp. SCSIO 07399/ $\Delta kmy18$ ; (iv) mutant strain *Verrucosispora* sp. SCSIO 07399/ $\Delta kmy26$ ; (v) mutant strain *Verrucosispora* sp. SCSIO 07399/ $\Delta kmy29$ ; (vi) the wild-type strain; (vii) mutant strain *Verrucosispora* sp. SCSIO 07399/ $\Delta orf(-2)$ -*kmy3*; (viii) mutant strain *Verrucosispora* sp. SCSIO 07399/ $\Delta kmy22$ -25; (ix) mutant strain *Verrucosispora* sp. SCSIO 07399/ $\Delta kmy27$ -*orf(+2)*; (x) complemented strain *Verrucosispora* sp. SCSIO 07399/ $\Delta kmy27$ -*orf(+2)::kmy29*.

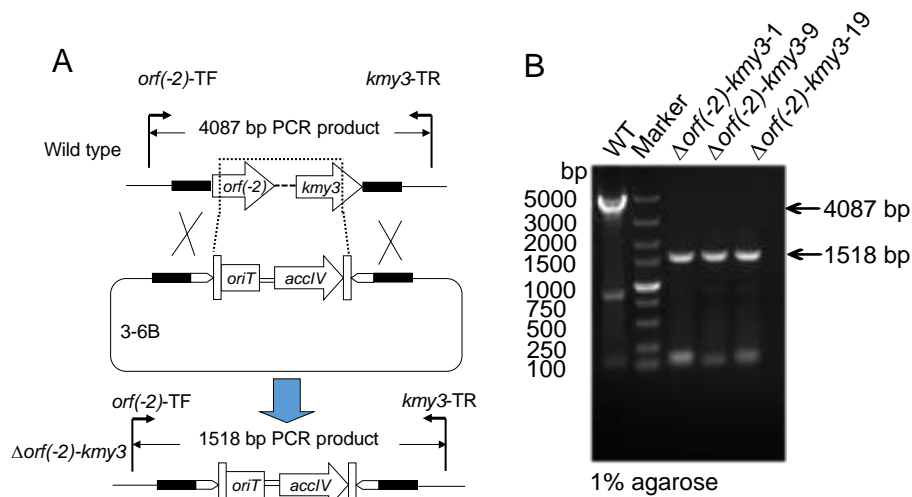

**Figure S5.** Construction of *orf(-2)-kmy3* genes mutant strain of *Verrucosispora* sp. SCSIO 07399 by PCR-targeting technique. (A) Schematic diagram of genes *orf(-2)-kmy3* disruption. (B) Verification of the genes *orf(-2)-kmy3* double-cross mutants by comparing with the wild-type strain *via* PCR using the primers listed in **Table S2**. WT: wild-type strain;  $\Delta orf(-2)$ -*kmy3*: genes *orf(-2)-kmy3* mutant strains. **Marker: DL5000 DNA Marker (Takara).**

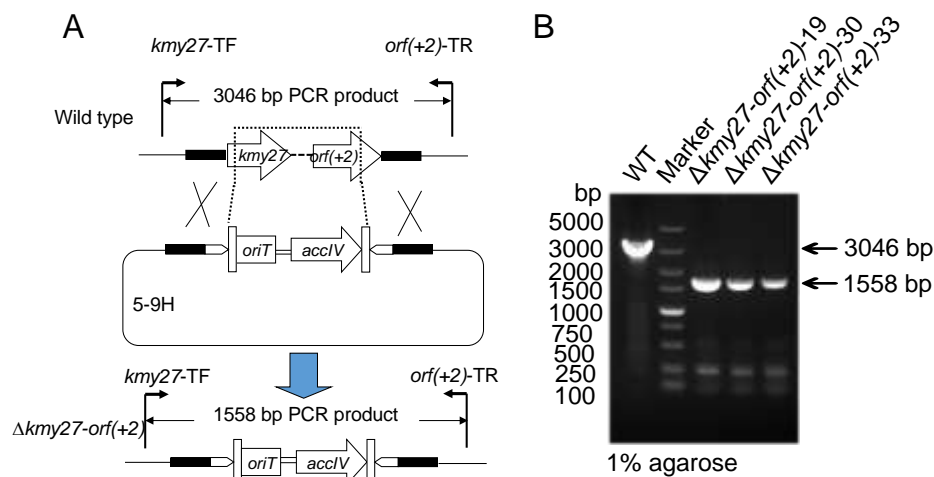

**Figure S6.** Construction of *kmy27-orf(+2)* genes mutant strain of *Verrucosispora* sp. SCSIO 07399 by PCR-targeting technique. (A) Schematic diagram of genes *kmy27-orf(+2)* disruption. (B) Verification of the genes *kmy27-orf(+2)* double-cross mutants by comparing with the wild-type strain *via* PCR using the primers listed in **Table S2**. WT: wild-type strain; Δ*kmy27-orf(+2)*: genes *kmy27-orf(+2)* mutant strains. **Marker: DL5000 DNA Marker (Takara).**

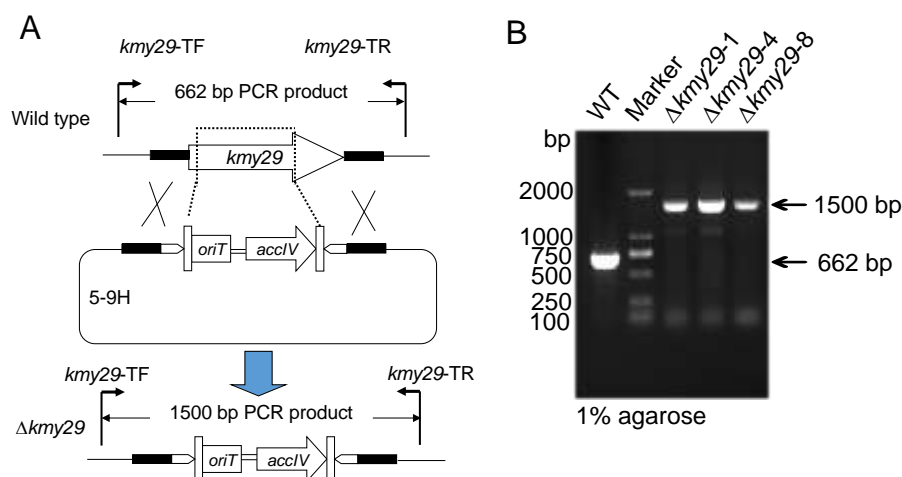

**Figure S7.** Construction of *kmy29* gene mutant strain of *Verrucosispora* sp. SCSIO 07399 by PCR-targeting technique. (A) Schematic diagram of gene *kmy29* disruption. (B) Verification of the gene *kmy29* double-cross mutants by comparing with the wild-type strain *via* PCR using the primers listed in **Table S2**. WT: wild-type strain; Δ*kmy29*: gene *kmy29* mutant strains. **Marker: DL2000 DNA Marker (Takara).**



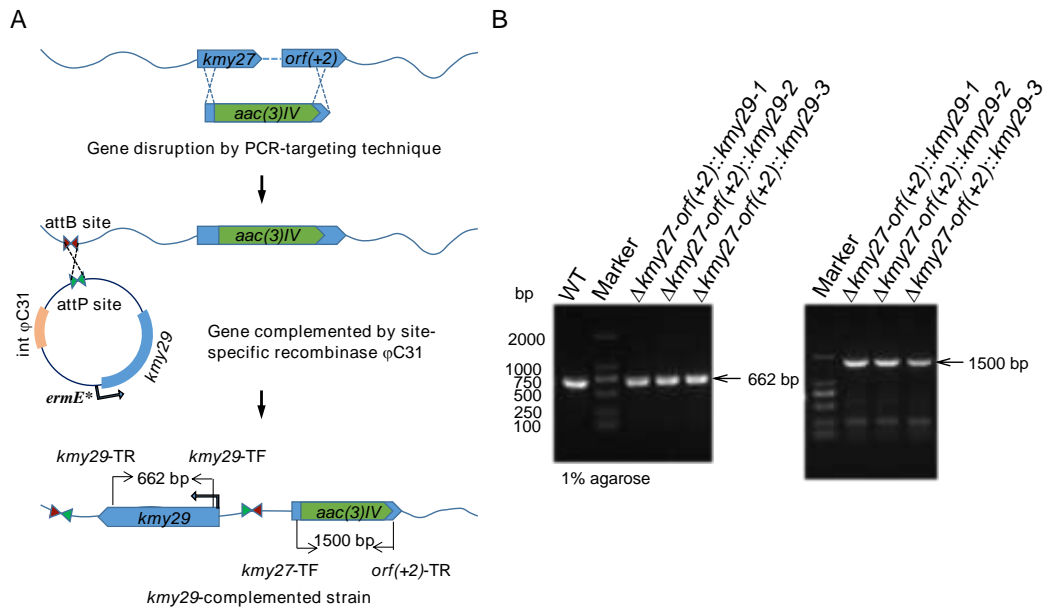

**Figure S8.** Construction of *kmy29* gene complemented strain of *Verrucosipora* sp. SCSIO 07399/ $\Delta$ kmy27-orf(+2) by site-specific recombinase  $\phi$ C31 system. (A) Schematic diagram of gene complement process. (B) Verification of the gene *kmy29* complemented strains by comparing with the wild-type strain *via* PCR using the primers listed in Table S2. WT: wild-type strain;  $\Delta$ kmy27-orf(+2)::kmy29: gene *kmy29* complemented strains. **Marker:** DL2000 DNA Marker (Takara).

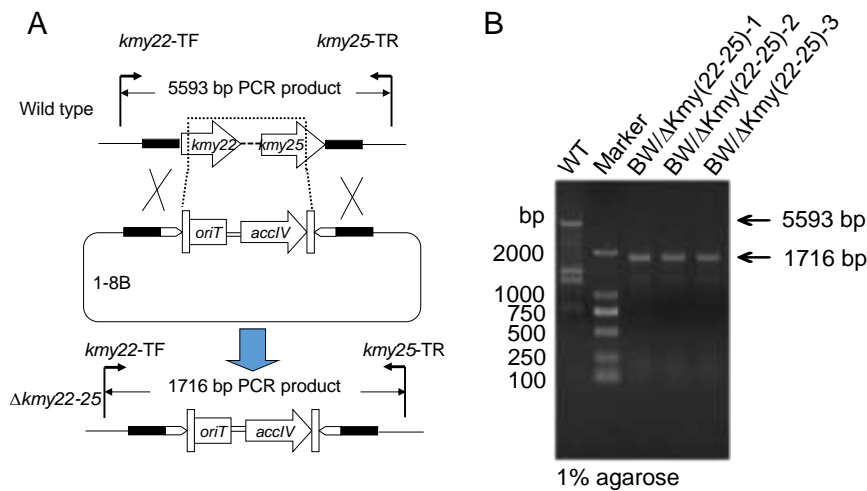

**Figure S9.** Construction of *kmy22-25* genes mutant strain of *Verrucosipora* sp. SCSIO 07399 by PCR-targeting technique. (A) Schematic diagram of genes *kmy22-25* disruption. (B) Verification of the genes *kmy22-25* double-cross mutants by comparing with the wild-type strain *via* PCR using the primers listed in Table S2. WT: wild-type strain;  $\Delta$ kmy22-25: genes *kmy22-25* mutant strains. **Marker:** DL2000 DNA Marker (Takara).

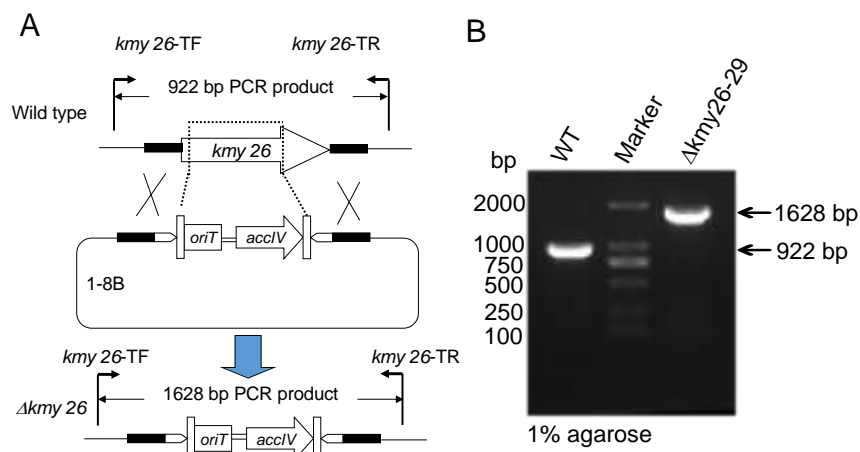

**Figure S10.** Construction of *kmy26* gene mutant strain of *Verrucosispora* sp. SCSIO 07399 by PCR-targeting technique. (A) Schematic diagram of gene *kmy26* disruption. (B) Verification of the gene *kmy26* double-cross mutants by comparing with the wild-type strain *via* PCR using the primers listed in **Table S2**. WT: wild-type strain;  $\Delta kmy26$ : gene *kmy26* mutant strains. **Marker:** DL2000 DNA Marker (Takara).

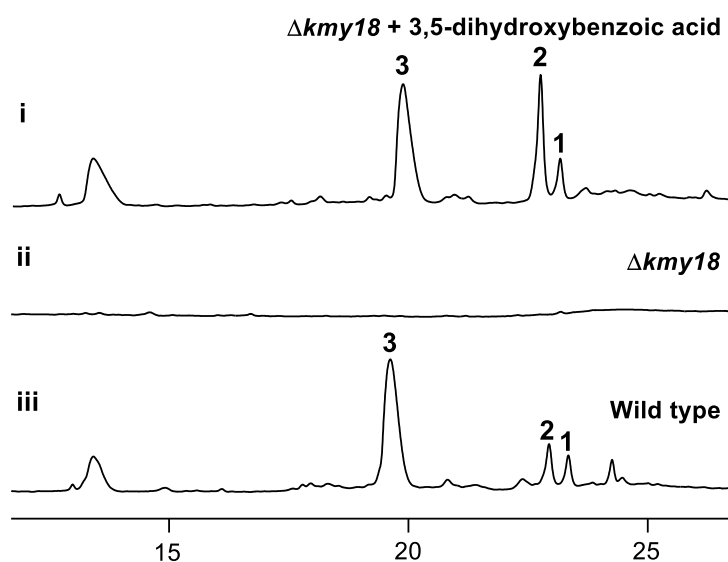

**Figure S11.** Chemical complementation of type III PKS gene mutant strain  $\Delta kmy18$ . HPLC analysis (UV at 285 nm) of fermentation broths from (i)  $\Delta kmy18$  feeding with 3,5-dihydroxybenzoic acid; (ii) mutant strain  $\Delta kmy18$ ; (iii) the wild-type strain *Verrucosispora* sp. SCSIO 07399.



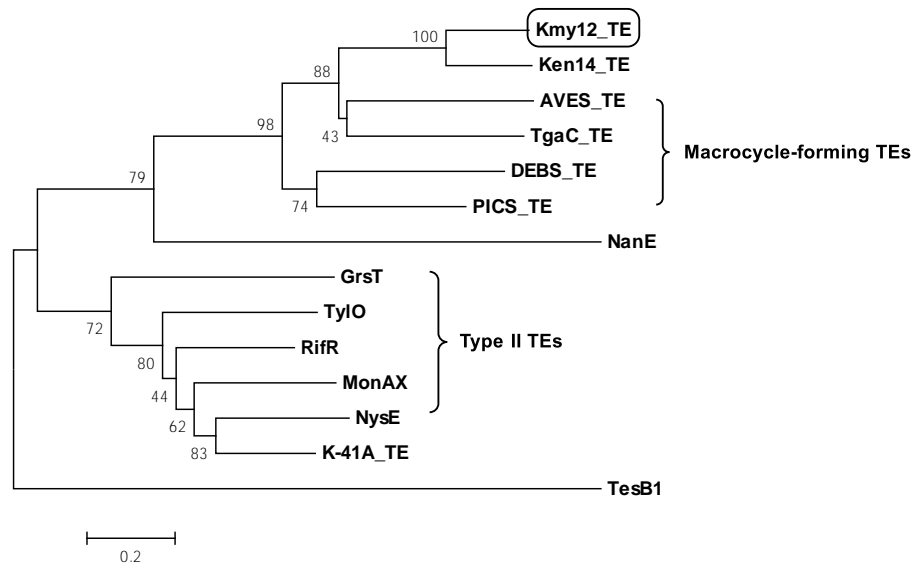

**Figure S14.** Phylogenetic analysis of Kmy12\_TE and other thioesterases.

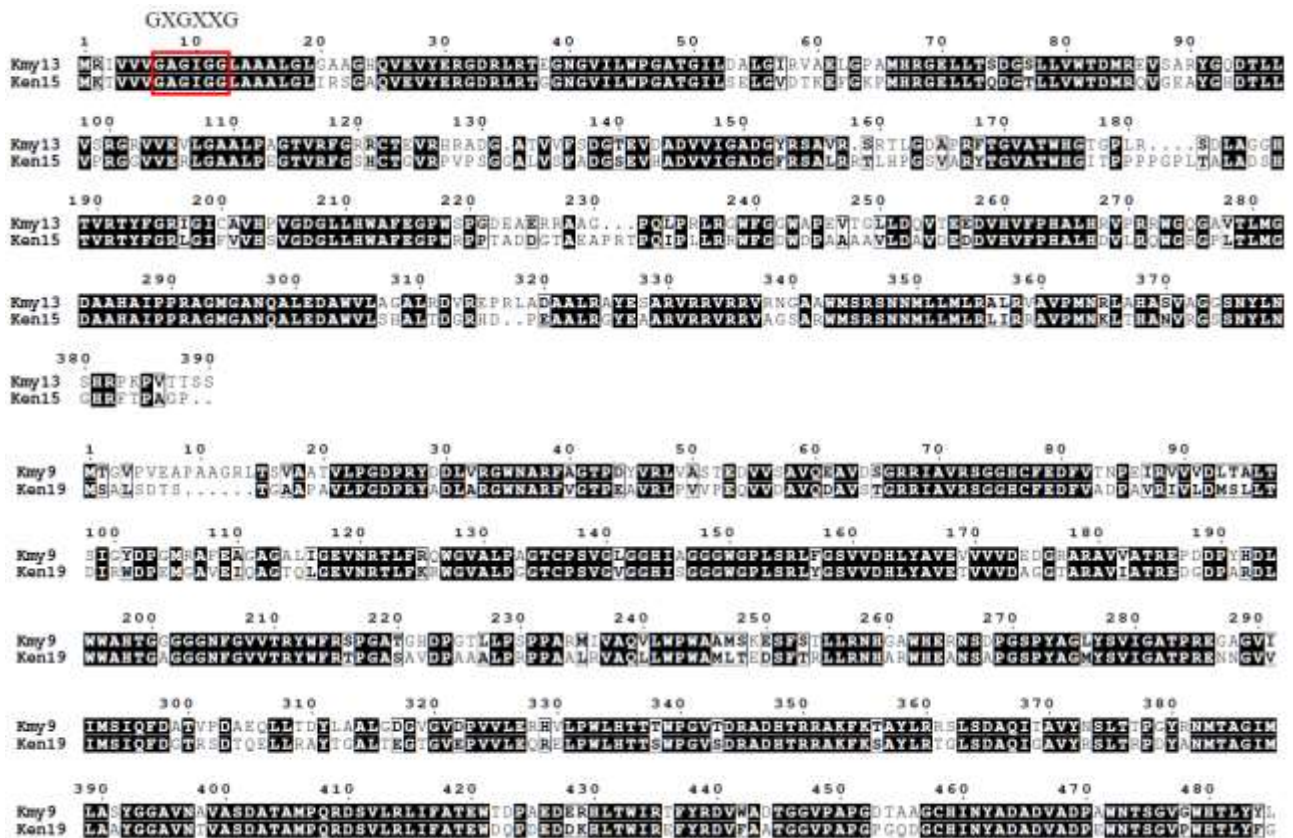

**Figure S15.** Sequence analysis of FAD-dependent oxidoreductase Kmy9 and FAD-dependent monooxygenase Kmy13 by comparing with their corresponding homologues. The characteristic GxGxxG fingerprint was highlighted.

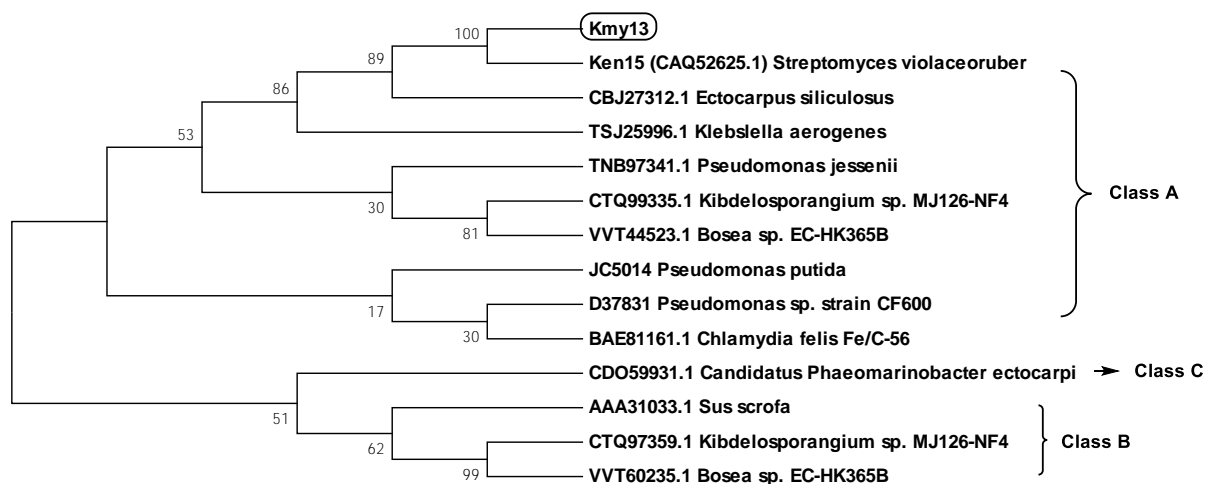

**Figure S16.** Phylogenetic analysis of Kmy13. Class D-F flavoprotein monooxygenases were all encoded by two genes encoding a monooxygenase and a reductase, so we didn't use them to construct the phylogenetic tree.

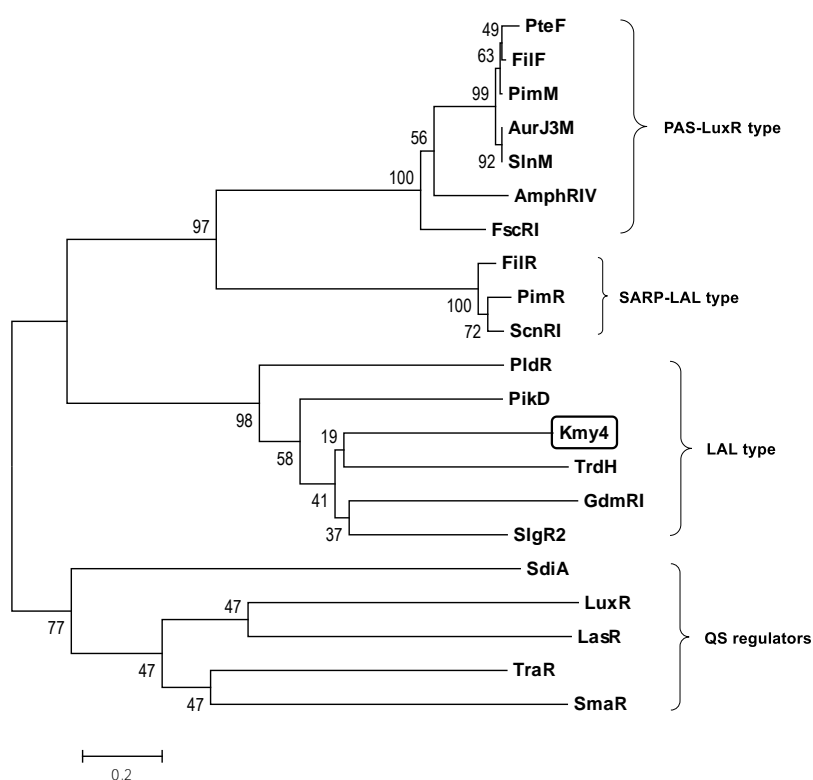

**Figure S17.** Phylogenetic analysis of Kmy4 and other LuxR-type regulators.



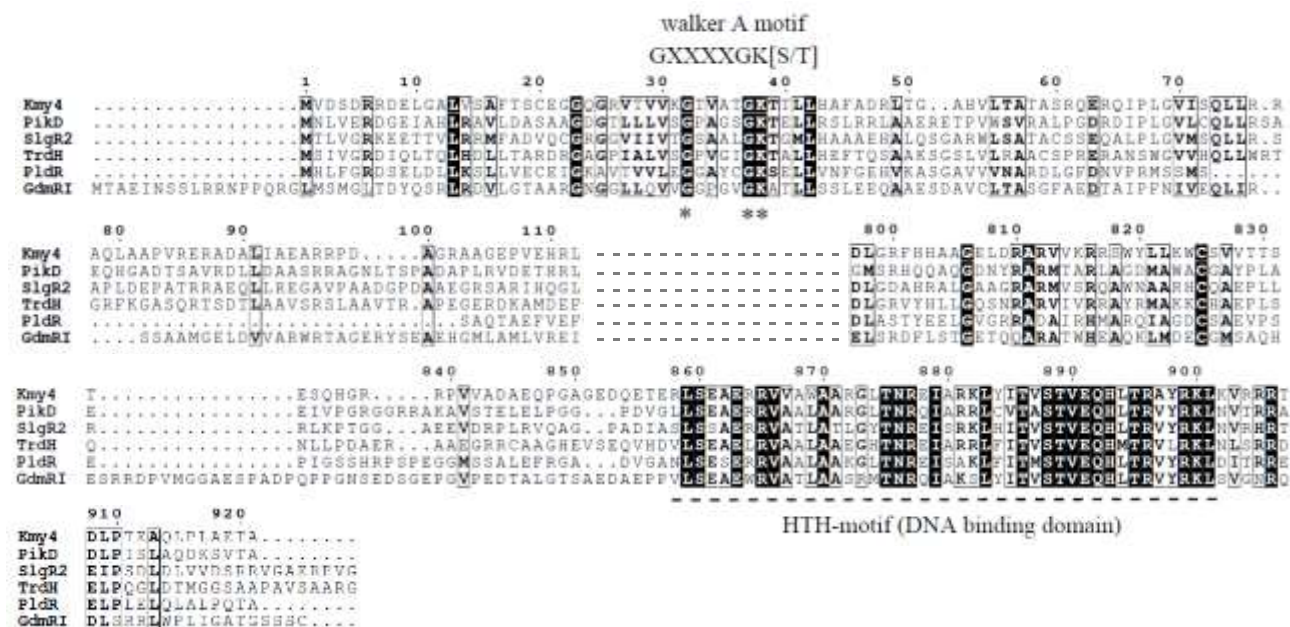

**Figure S18.** Sequence alignment of Kmy4 with several representative LAL-type LuxR family regulators (just presented the key regions). The conserved walker A motif GXXXXGK[S/T] was marked by asterisks, and the putative helix-turn-helix (HTH)-DNA binding motif was underlined by dotted line.

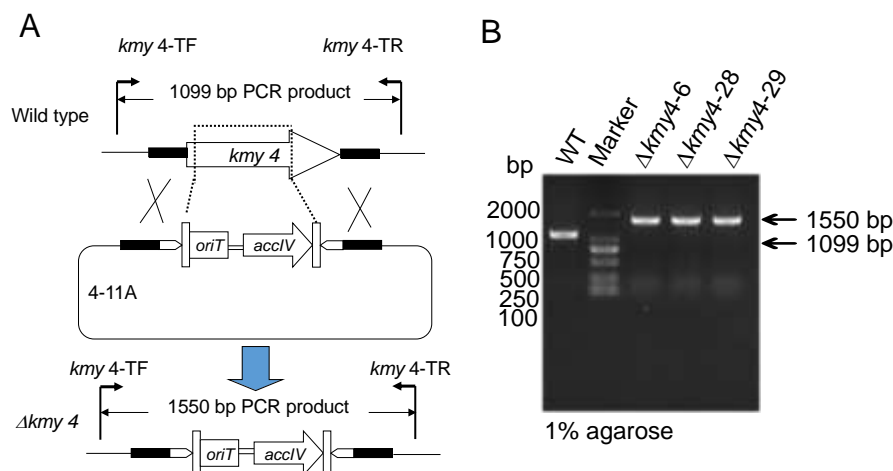

**Figure S19.** Construction of *kmy4* gene mutant strain of *Verrucosipora* sp. SCSIO 07399 by PCR-targeting technique. (A) Schematic diagram of gene *kmy4* disruption. (B) Verification of the gene *kmy4* double-cross mutants by comparing with the wild-type strain via PCR using the primers listed in Table S2. WT: wild-type strain; *Δkmy4*: gene *kmy4* mutant strains. **Marker: DL2000 DNA Marker (Takara).**

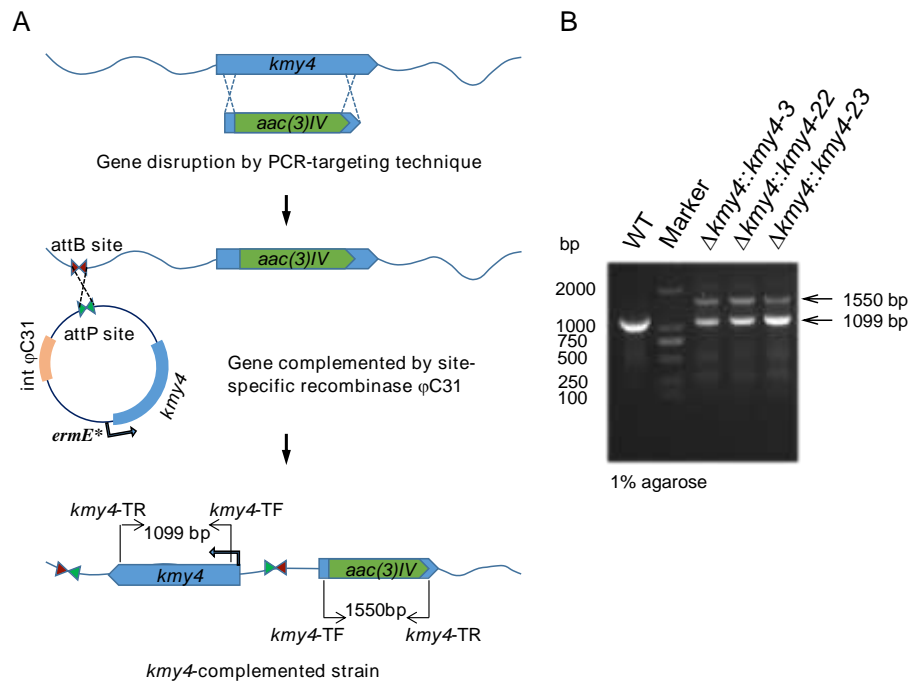

**Figure S20.** Construction of *kmy4* gene complemented strain of *Verrucosipora* sp. SCSIO 07399/ $\Delta$ *kmy4* by site-specific recombinase  $\phi$ C31 system. (A) Schematic diagram of gene complement process. (B) Verification of the gene *kmy4* complemented strains by comparing with the wild-type strain *via* PCR using the primers listed in **Table S2**. WT: wild-type strain;  $\Delta$ *kmy4*::*kmy4*: gene *kmy4* complemented strains. **Marker: DL2000 DNA Marker (Takara).**

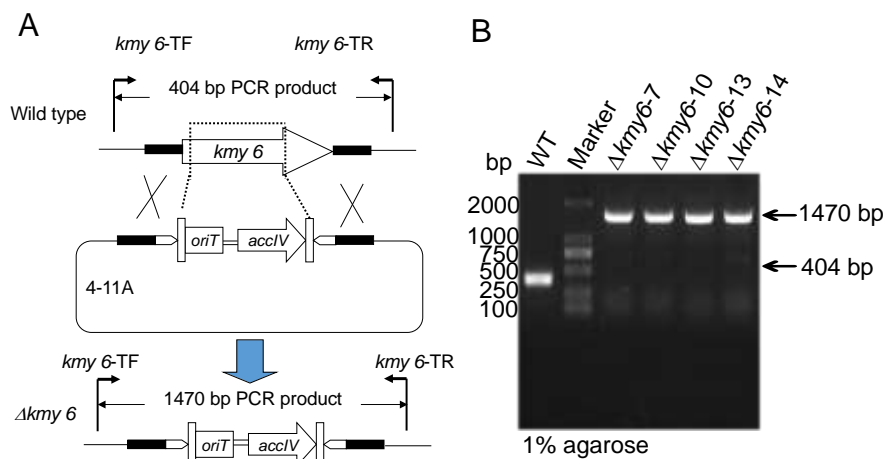

**Figure S21.** Construction of *kmy6* gene mutant strain of *Verrucosipora* sp. SCSIO 07399 by PCR-targeting technique. (A) Schematic diagram of gene *kmy6* disruption. (B) Verification of the gene *kmy6* double-cross mutants by comparing with the wild-type strain *via* PCR using the primers listed in **Table S2**. WT: wild-type strain;  $\Delta$ *kmy6*: gene *kmy6* mutant strains. **Marker: DL2000 DNA Marker (Takara).**

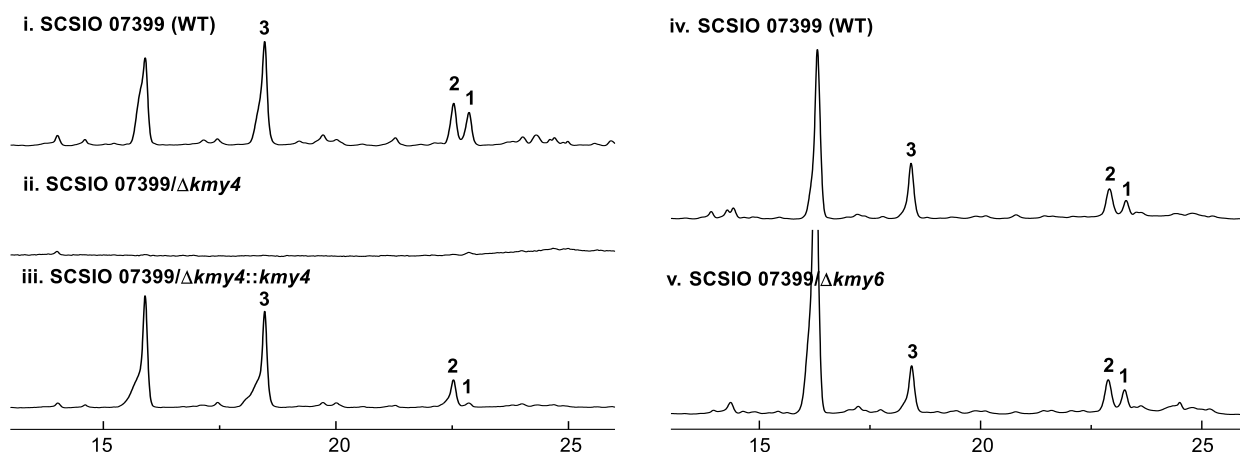

**Figure S22.** HPLC analysis (UV at 285 nm) of fermentation broths from regulatory gene mutants. (i) the wild-type strain *Verrucosispora* sp. SCSIO 07399; (ii) mutant strain *Verrucosispora* sp. SCSIO 07399/ $\Delta kmy4$ ; (iii) *kmy4* gene complemented strain *Verrucosispora* sp. SCSIO 07399/ $\Delta kmy4::kmy4$ ; (iv) the wild-type strain; (v) mutant strain *Verrucosispora* sp. SCSIO 07399/ $\Delta kmy6$ .

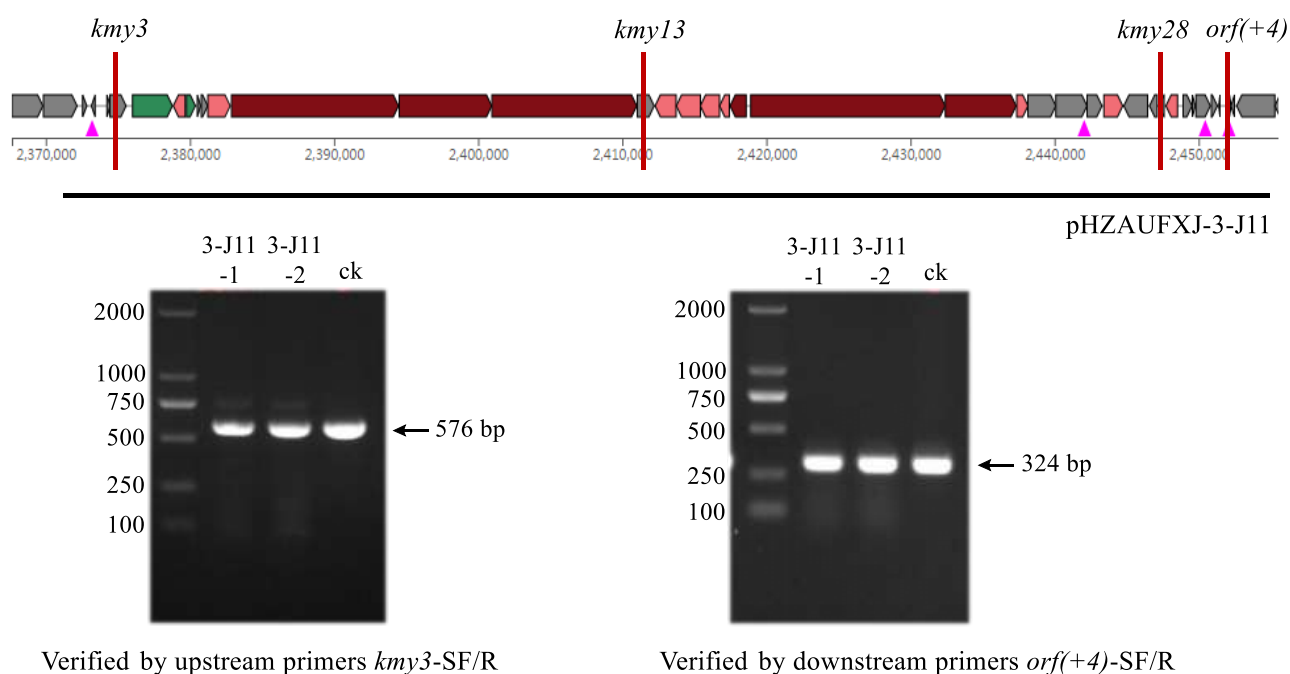

**Figure S23.** PCR identification of the genotype of *kmy* gene cluster hetero-expression strain by using the primers listed in Table S2. 3-J11: *Streptomyces coelicolor* M1152::pHZAUFXJ-3-J11; ck: control check using the wild-type genome as PCR template. Marker: DL2000 DNA Marker (Takara).



## Reference

1. MacNeil, D.J.; Gewain, K.M.; Ruby, C.L.; Dezeny, G.; Gibbons, P.H.; MacNeil, T. Analysis of *Streptomyces avermitilis* genes required for avermectin biosynthesis utilizing a novel integration vector. *Gene* **1992**, *111*, 61-68.
2. Gust, B.; Chandra, G.; Jakimowicz, D.; Yuqing, T.; Bruton, C.J.; Chater, K.F. Lambda red-mediated genetic manipulation of antibiotic-producing *Streptomyces*. *Adv. Appl. Microbiol.* **2004**, *54*, 107-128.
3. Flett, F.; Mersinias, V.; Smith, C.P. High efficiency intergeneric conjugal transfer of plasmid DNA from *Escherichia coli* to methyl DNA-restricting streptomycetes. *FEMS Microbiology Letters* **1997**, *155*, 223-229.
4. Datsenko, K.A.; Wanner, B.L. One-step inactivation of chromosomal genes in *Escherichia coli* K-12 using PCR products. *Proc. Natl. Acad. Sci. U.S.A.* **2000**, *97*, 6640-6645.
5. Paget, M.S.; Chamberlin, L.; Atrih, A.; Foster, S.J.; Buttner, M.J. Evidence that the extracytoplasmic function sigma factor sigmaE is required for normal cell wall structure in *Streptomyces coelicolor* A3(2). *J. Bacteriol.* **1999**, *181*, 204-211.
6. Zhang, S.; Xie, Q.; Sun, C.; Tian, X.; Gui, C.; Qin, X.; Zhang, H.; Ju, J. Cytotoxic kendomycins containing the carbacylic *ansa* scaffold from the marine-derived *Verrucosisspora* sp. SCSIO 07399. *J. Nat. Prod.* **2019**, *82*, 3366–3371.
